# Supplementary material for: TIM-3 inhibits PDGF-BB-induced atherogenic responses in human artery vascular smooth muscle cells
Source: PubMed Central journal article supplement — Mol Med Rep. 2020 May 21;22(2):886–94. doi: 10.3892/mmr.2020.11167 (PMC7339574; doi:10.3892/mmr.2020.11167), 2020-05-21

Figure S1. TIM-3 expression increases significantly following transduction with LV-TIM-3. TIM-3 protein expression was determined by western blotting and quantified. \*\*P<0.01 as indicated. TIM-3, T-cell immunoglobulin and mucin domain 3; LV, lentivirus.

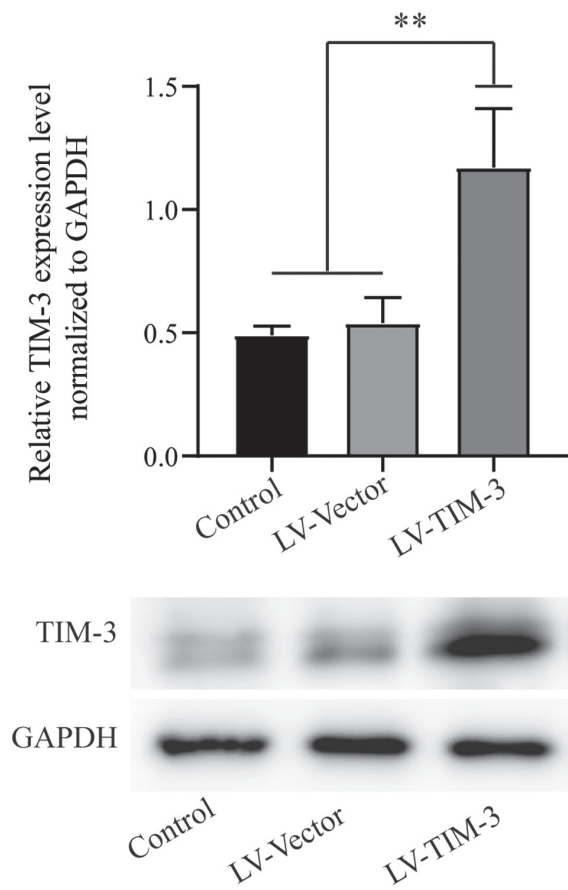

Supplement: Supplementary_Data.pdf [file Supplementary_Data.pdf]
